# Supplementary material
Source: Royal Society of Chemistry journal article supplement (doi:10.1039/d6qi00542j)
Supplement: d6qi00542j1.pdf [file d6qi00542j1.pdf]

## Supporting information

### A rare-earth double perovskite ferroelastic for low-bias X-ray detection

Ze-Yu Jia<sup>a,b,†</sup>, Zheng-Hui Hu<sup>a,b,†</sup>, Hong-Fei Zhao<sup>a,c</sup>, Ting Hai<sup>a,b</sup>, Yi Wu<sup>a,b</sup>, Dong-Lan Zhang<sup>c,\*</sup>, Chang-Chun Fan<sup>a,d,\*</sup>, Yong Ai<sup>e</sup>, Chao Shi<sup>a,b,\*</sup>

<sup>a</sup>Jiangxi Province Key Laboratory of Functional Crystalline Materials Chemistry, Jiangxi University of Science and Technology, Ganzhou 341000, Jiangxi Province, P.R. China.

<sup>b</sup>Chaotic Matter Science Research Center, International Institute for Innovation, Jiangxi University of Science and Technology, Nanchang, Jiangxi Province, 330013, P.R. China.

<sup>c</sup>School of Energy and Mechanical Engineering, Jiangxi University of Science and Technology, Nanchang, Jiangxi Province, 330013, P.R. China.

<sup>d</sup>School of Materials Engineering, Jinling Institute of Technology, Nanjing, Jiangsu Province, 211169, P.R. China.

<sup>e</sup>Ordered Matter Science Research Center, Nanchang University, Nanchang, Jiangxi Province, 330013, P.R. China..

E-mail address: donglanzhangll@163.com; ccfanchem@jit.edu.cn; 13064147687@163.com.

## **Physical measurements**

### **IR measurements**

The infrared spectrum of **1** was recorded at room temperature on a Shimadzu IR-60 spectrometer using a KBr pellet.

### **PXRD measurements**

PXRD data were collected on a PANalytical X'Pert PRO X-ray diffractometer using Cu-K $\alpha$  radiation ( $\lambda = 1.54184 \text{ \AA}$ ), scanning the  $2\theta$  range from  $5^\circ$  to  $50^\circ$  with a step size of  $0.02^\circ$ .

### **TGA measurements**

**1** was measured using a NETZSCH TG 209F<sup>3</sup> instrument under ambient pressure with nitrogen protection. The sample was placed in an Al<sub>2</sub>O<sub>3</sub> crucible and heated from room temperature to 900 K at a rate of  $10 \text{ K}\cdot\text{min}^{-1}$ .

### **DSC measurements**

DSC measurements were conducted using a NETZSCH instrument under standard atmospheric pressure at heating/cooling rates of 20, 15, 10, 5, and  $2 \text{ K}\cdot\text{min}^{-1}$ , yielding five corresponding measure curves.

### **Ferroelastic measurements**

Ferroelastic domain characterization was conducted on a Nikon ECLIPSE Ci-POL polarizing microscope, equipped with a temperature control stage. Real-time orthogonal polarized light observation was performed to monitor the domain structure evolution of **1** across the phase transition temperature.

### **DFT computational**

All calculations were performed using the Vienna Ab initio Simulation Package (VASP) with the projector-augmented wave (PAW) pseudopotentials. The exchange-correlation interaction was described by the generalized gradient approximation (GGA) in the Perdew-Burke-Ernzerhof (PBE) functional. A plane-wave cutoff energy of 520 eV was used. The Brillouin zone was sampled with a Monkhorst-Pack k-point mesh of  $3\times 4\times 6$ . The energy convergence criterion was set to  $1.0\times 10^{-6} \text{ eV/atom}$ , and the force convergence criterion was

$1.0 \times 10^{-2}$  eV/Å. A DFT+U correction was applied to the Ce 4f orbitals with a Hubbard U parameter of  $U^f = 5.0$  eV.

### Dielectric measurements

The dielectric constant  $\varepsilon$  ( $\varepsilon = \varepsilon' - i\varepsilon''$ ) of **1** was measured over a frequency range of 500 Hz–1 MHz and a temperature range of 300 K–390 K using a Tonghui TH2828A analyzer at a fixed measurement voltage of 1 V. For the measurement, a pressed-pellet sample of **1** was sandwiched between two parallel copper electrodes using carbon conductive adhesive, which served as the sample holder.

### Single-crystal X-ray crystallography.

Variable-temperature single-crystal X-ray diffraction data for **1** were collected on a Rigaku Varimax<sup>TM</sup> DW diffractometer equipped with Mo- $K_\alpha$  radiation ( $\lambda = 0.71073$  Å) using the four-circle measurement method. Diffraction data acquisition was performed with a HyPix-6000HE detector, and data processing including empirical absorption correction was carried out with the Crystal-clear software package (Rigaku OD, 2018). The crystal structure was solved by direct methods and refined by full-matrix least-squares on  $F^2$  using the SHELXLTL software package. All non-hydrogen atoms were refined anisotropically, and only reflections with  $I > 2\sigma(I)$  were used in the refinement. Hydrogen atom positions were generated geometrically and refined using a riding model, with thermal parameters set as  $U_{\text{iso}} = 1.2U_{\text{eq}}$ . Molecular structure plots and crystal packing diagrams were prepared with DIAMOND software (Brandenburg & Putz, 2005). Bond distances and angles were calculated with DIAMOND, and other relevant crystallographic calculations were performed using SHELXLTL.

The  $\Delta S$  and  $N$  for **1** were determined from the DSC curve acquired at a heating rate of  $10 \text{ K min}^{-1}$ .

$$\Delta S = \int_{T_1}^{T_2} \frac{Q}{T} dT \approx \frac{\Delta H}{T} = \frac{6.19 \text{ J} \cdot \text{g}^{-1} \times 775.18 \text{ g} \cdot \text{mol}^{-1}}{400 \text{ K}} \approx 11.996 \text{ J} \cdot \text{mol}^{-1} \cdot \text{K}^{-1}$$

$$N = \exp\left(\frac{\Delta S}{R}\right) = \exp\left(\frac{11.996 \text{ J} \cdot \text{mol}^{-1} \cdot \text{K}^{-1}}{8.314 \text{ J} \cdot \text{mol}^{-1} \cdot \text{K}^{-1}}\right) \approx 4.233$$

At 253 K, a quantitative analysis was performed on the coordination environment of the  $\text{Rb}^+$ . The bond-length distortion index ( $\Delta D$ ) and bond-angle variance ( $\sigma^2$ ) were calculated to evaluate the geometry distortion, using the following formulas:

$$D = \frac{1}{6} \sum_{i=1}^6 \times \left[ \frac{(d_i - \langle d \rangle)}{\langle d \rangle} \right]^2$$

where  $d_i$  is the length of the Rb–O bond, and  $d$  is the average length of the six Rb–O bonds.

$$\sigma^2 = \frac{1}{12} \sum_{j=1}^{12} \times (\theta_j - 90) ^2$$

where  $\theta_j$  represents the adjacent O–Rb–O bond angles within the octahedron, for which the ideal value is  $90^\circ$ .

**Figures:**

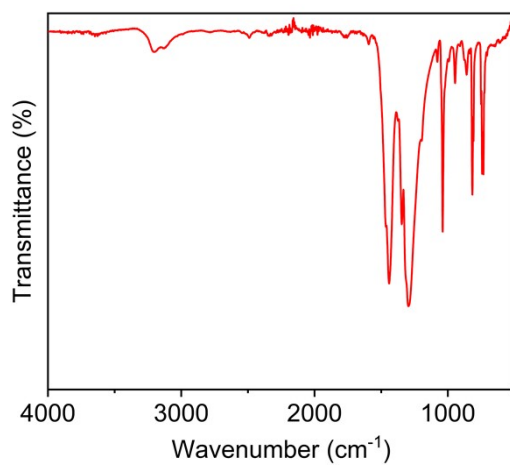

**Fig. S1** Infrared spectrum of **1** measured at 293 K.

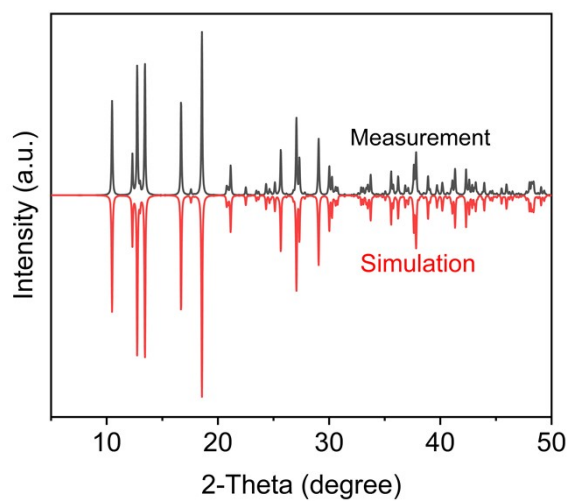

**Fig. S2** Comparison of the experimental and simulated single-crystal X-ray diffraction patterns for **1** measured at room temperature.

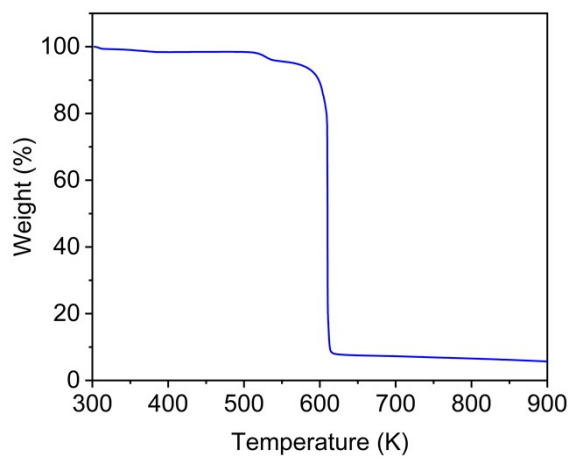

**Fig. S3** TGA measurement of **1**.

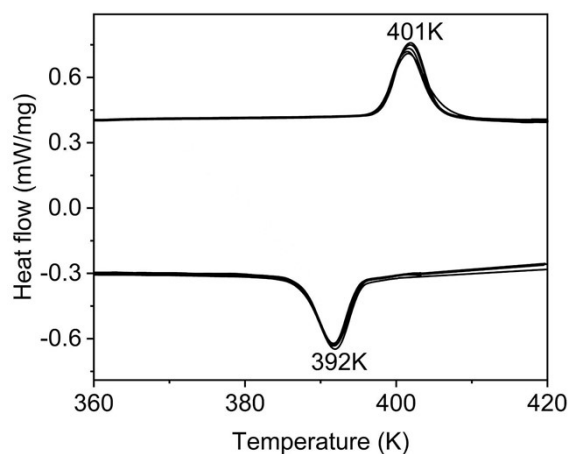

**Fig. S4** Five-cycle DSC measurement of **1**.

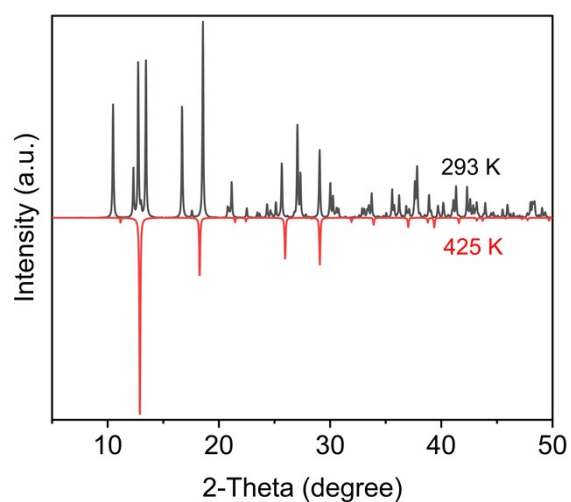

**Fig. S5** Comparison of in-situ variable-temperature X-ray diffraction patterns for **1** collected at 293 K and 425 K.

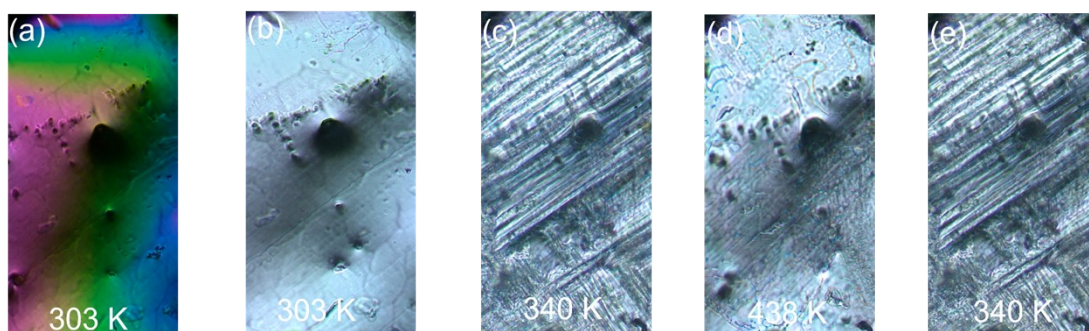

**Fig. S6** Optical micrographs of crystal **1** under natural light during heating and cooling processes. Figure S6a shows the photograph taken under a polarizing microscope at 303 K.

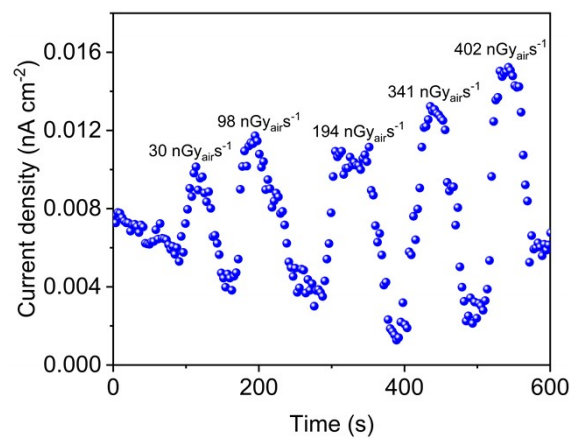

**Fig.S7** The X-ray detection response behavior of **1** at 0 V bias.

## Tables:

Table S1. Crystal structure and refinement detail of **1** at 253 K and 425 K.

| <i>T</i> / K                                                                                              | 253                                                   | 425             |
|-----------------------------------------------------------------------------------------------------------|-------------------------------------------------------|-----------------|
| Formula weight                                                                                            | 775.88                                                | 1154.87         |
| Crystal system                                                                                            | orthorhombic                                          | Cubic           |
| Space group                                                                                               | <i>P</i> 2 <sub>1</sub> 2 <sub>1</sub> 2 <sub>1</sub> | <i>F</i> 432    |
| <i>a</i> / Å                                                                                              | 21.2321(5)                                            | 13.7238(8)      |
| <i>b</i> / Å                                                                                              | 13.8822(3)                                            | 13.7238(8)      |
| <i>c</i> / Å                                                                                              | 8.3964(2)                                             | 13.7238(8)      |
| <i>α</i> / °                                                                                              | 90                                                    | 90              |
| <i>β</i> / °                                                                                              | 90                                                    | 90              |
| <i>γ</i> / °                                                                                              | 90                                                    | 90              |
| <i>V</i> / Å <sup>3</sup>                                                                                 | 2474.82(10)                                           | 2584.8(5)       |
| <i>Z</i>                                                                                                  | 4                                                     | 4               |
| <i>D</i> <sub>calc</sub> / g·cm <sup>3</sup>                                                              | 2.082                                                 | 2.968           |
| <i>μ</i> / mm <sup>-1</sup>                                                                               | 3.903                                                 | 5.252           |
| <i>F</i> (000)                                                                                            | 1508.0                                                | 2205.0          |
| 2 <i>θ</i> range / °                                                                                      | 2.415 to 30.963                                       | 4.200 to 30.973 |
| Reflns collected                                                                                          | 27909                                                 | 2383            |
| <i>R</i> <sub>int</sub>                                                                                   | 0.0277                                                | 0.1331          |
| No. of parameters                                                                                         | 344                                                   | 22              |
| <i>R</i> <sub>1</sub> <sup>[a]</sup> , <i>wR</i> <sub>2</sub> <sup>[b]</sup> [ <i>I</i> > 2σ( <i>I</i> )] | 0.0393, 0.0962                                        | 0.2513, 0.5590  |
| <i>R</i> <sub>1</sub> , <i>wR</i> <sub>2</sub> [all data]                                                 | 0.0500, 0.1004                                        | 0.3349, 0.5865  |
| GOF                                                                                                       | 1.034                                                 | 1.939           |
| Δρ <sup>[c]</sup> / e·Å <sup>-3</sup>                                                                     | 1.200 / -0.827                                        | 3.523 / -1.798  |
| CCDC                                                                                                      | 2526909                                               | 2526920         |

$${}^a R_1 = \sum ||F_o| - |F_c|| / \sum |F_o|, {}^b wR_2 = [\sum (|F_o|^2 - |F_c|^2) / \sum |F_o|^2]^{1/2}$$

Table S2. Selected bond lengths for **1** at 253 K.

| Bond        | Length/ Å | Bond       | Length/ Å |
|-------------|-----------|------------|-----------|
| Ce(1)–O(4)  | 2.599(6)  | C(4)–C(3)  | 1.492(11) |
| Ce(1)–O(6)  | 2.605(7)  | C(4)–H(4A) | 0.9700    |
| Ce(1)–O(17) | 2.613(7)  | C(4)–H(4B) | 0.9700    |
| Ce(1)–O(7)  | 2.612(7)  | N(4)–O(12) | 1.213(8)  |
| Ce(1)–O(9)  | 2.614(7)  | N(1)–O(3)  | 1.266(9)  |

|             |           |            |           |
|-------------|-----------|------------|-----------|
| Ce(1)–O(1)  | 2.616(5)  | O(13)–N(5) | 1.206(12) |
| Ce(1)–O(10) | 2.621(4)  | N(8)–C(7)  | 1.460(10) |
| Ce(1)–O(15) | 2.623(7)  | N(8)–C(6)  | 1.469(10) |
| Ce(1)–O(14) | 2.622(7)  | N(8)–H(8)  | 0.8600    |
| Ce(1)–O(16) | 2.641(7)  | N(7)–C(1)  | 1.465(10) |
| Ce(1)–O(11) | 2.661(5)  | N(7)–H(7)  | 0.8600    |
| Ce(1)–O(2)  | 2.677(5)  | C(6)–C(5)  | 1.517(11) |
| Rb(1)–O(18) | 2.826(5)  | C(6)–H(6A) | 0.9700    |
| Rb(1)–F(2)  | 2.903(8)  | C(6)–H(6B) | 0.9700    |
| Rb(1)–F(1)  | 2.983(7)  | F(1)–C(2)  | 1.395(16) |
| O(9)–N(3)   | 1.188(14) | C(8)–F(2)  | 1.462(17) |
| O(14)–N(5)  | 1.277(15) | C(8)–C(7)  | 1.473(11) |
| O(16)–N(6)  | 1.265(14) | C(8)–C(5)  | 1.502(12) |
| O(10)–N(4)  | 1.275(7)  | C(8)–H(8A) | 0.9800    |
| O(1)–N(1)   | 1.255(7)  | C(1)–C(2)  | 1.462(11) |
| O(4)–N(2)   | 1.282(13) | C(1)–H(1A) | 0.9700    |
| O(11)–N(4)  | 1.247(8)  | C(1)–H(1B) | 0.9700    |
| O(15)–N(5)  | 1.276(14) | C(7)–H(7A) | 0.9700    |
| O(2)–N(1)   | 1.231(8)  | C(7)–H(7B) | 0.9700    |
| N(2)–O(5)   | 1.224(11) | C(2)–C(3)  | 1.475(12) |
| N(2)–O(6)   | 1.237(12) | C(2)–H(2)  | 0.9800    |
| O(7)–N(3)   | 1.334(14) | C(3)–H(3A) | 0.9700    |
| O(17)–N(6)  | 1.253(14) | C(3)–H(3B) | 0.9700    |
| N(3)–O(8)   | 1.229(7)  | C(5)–H(5A) | 0.9700    |
| N(6)–O(18)  | 1.228(7)  | C(5)–H(5B) | 0.9700    |
| C(4)–N(7)   | 1.458(11) |            |           |

Table S3. Selected bond angles for **1** at 253 K.

| Bond             | Angles [°] | Bond             | Angles [°] |
|------------------|------------|------------------|------------|
| O(4)–Ce(1)–O(6)  | 48.4(3)    | O(10)–Ce(1)–O(2) | 133.62(14) |
| O(4)–Ce(1)–O(17) | 68.1(2)    | O(15)–Ce(1)–O(2) | 66.8(3)    |
| O(6)–Ce(1)–O(17) | 68.0(2)    | O(14)–Ce(1)–O(2) | 110.7(3)   |
| O(4)–Ce(1)–O(7)  | 69.1(2)    | O(16)–Ce(1)–O(2) | 109.3(2)   |
| O(6)–Ce(1)–O(7)  | 66.5(2)    | O(11)–Ce(1)–O(2) | 178.0(2)   |
| O(17)–Ce(1)–O(7) | 131.3(2)   | O(18)–Rb(1)–F(2) | 129.7(3)   |

|                   |            |                  |           |
|-------------------|------------|------------------|-----------|
| O(4)–Ce(1)–O(9)   | 112.7(2)   | O(18)–Rb(1)–F(1) | 115.4(3)  |
| O(6)–Ce(1)–O(9)   | 111.1(2)   | F(2)–Rb(1)–F(1)  | 88.7(3)   |
| O(17)–Ce(1)–O(9)  | 178.1(3)   | N(3)–O(9)–Ce(1)  | 99.0(6)   |
| O(7)–Ce(1)–O(9)   | 48.59(16)  | N(5)–O(14)–Ce(1) | 96.7(6)   |
| O(4)–Ce(1)–O(1)   | 65.7(3)    | N(6)–O(16)–Ce(1) | 95.7(5)   |
| O(6)–Ce(1)–O(1)   | 110.1(2)   | N(4)–O(10)–Ce(1) | 97.3(4)   |
| O(17)–Ce(1)–O(1)  | 68.4(2)    | N(1)–O(1)–Ce(1)  | 97.0(4)   |
| O(7)–Ce(1)–O(1)   | 112.7(2)   | N(2)–O(4)–Ce(1)  | 97.1(6)   |
| O(9)–Ce(1)–O(1)   | 113.5(2)   | N(4)–O(11)–Ce(1) | 96.1(4)   |
| O(4)–Ce(1)–O(10)  | 115.2(3)   | N(5)–O(15)–Ce(1) | 96.6(6)   |
| O(6)–Ce(1)–O(10)  | 70.3(2)    | N(1)–O(2)–Ce(1)  | 94.7(3)   |
| O(17)–Ce(1)–O(10) | 110.3(2)   | O(5)–N(2)–O(6)   | 121.2(11) |
| O(7)–Ce(1)–O(10)  | 69.1(2)    | O(5)–N(2)–O(4)   | 122.5(11) |
| O(9)–Ce(1)–O(10)  | 67.7(2)    | O(6)–N(2)–O(4)   | 115.8(7)  |
| O(1)–Ce(1)–O(10)  | 178.17(15) | N(3)–O(7)–Ce(1)  | 95.1(5)   |
| O(4)–Ce(1)–O(15)  | 129.27(19) | N(6)–O(17)–Ce(1) | 97.4(5)   |
| O(6)–Ce(1)–O(15)  | 177.2(3)   | O(9)–N(3)–O(8)   | 125.8(13) |
| O(17)–Ce(1)–O(15) | 109.9(3)   | O(9)–N(3)–O(7)   | 116.8(5)  |
| O(7)–Ce(1)–O(15)  | 114.8(2)   | O(8)–N(3)–O(7)   | 117.2(12) |
| O(9)–Ce(1)–O(15)  | 71.0(3)    | O(18)–N(6)–O(17) | 122.7(12) |
| O(1)–Ce(1)–O(15)  | 67.1(3)    | O(18)–N(6)–O(16) | 119.8(12) |
| O(10)–Ce(1)–O(15) | 112.5(3)   | O(17)–N(6)–O(16) | 117.4(5)  |
| O(4)–Ce(1)–O(14)  | 178.2(3)   | N(2)–O(6)–Ce(1)  | 98.1(6)   |
| O(6)–Ce(1)–O(14)  | 133.11(19) | N(7)–C(4)–C(3)   | 99.4(10)  |
| O(17)–Ce(1)–O(14) | 111.2(3)   | N(7)–C(4)–H(4A)  | 111.9     |
| O(7)–Ce(1)–O(14)  | 112.1(3)   | C(3)–C(4)–H(4A)  | 111.9     |
| O(9)–Ce(1)–O(14)  | 68.0(3)    | N(7)–C(4)–H(4B)  | 111.9     |
| O(1)–Ce(1)–O(14)  | 112.5(3)   | C(3)–C(4)–H(4B)  | 111.9     |
| O(10)–Ce(1)–O(14) | 66.6(3)    | H(4A)–C(4)–H(4B) | 109.6     |
| O(15)–Ce(1)–O(14) | 49.2(3)    | N(6)–O(18)–Rb(1) | 149.2(5)  |
| O(4)–Ce(1)–O(16)  | 110.3(3)   | O(12)–N(4)–O(11) | 122.5(7)  |
| O(6)–Ce(1)–O(16)  | 113.3(2)   | O(12)–N(4)–O(10) | 119.7(7)  |
| O(17)–Ce(1)–O(16) | 48.36(17)  | O(11)–N(4)–O(10) | 117.8(6)  |
| O(7)–Ce(1)–O(16)  | 179.4(3)   | O(2)–N(1)–O(1)   | 120.2(5)  |

|                   |            |                  |           |
|-------------------|------------|------------------|-----------|
| O(9)–Ce(1)–O(16)  | 131.8(2)   | O(2)–N(1)–O(3)   | 121.2(7)  |
| O(1)–Ce(1)–O(16)  | 66.7(2)    | O(1)–N(1)–O(3)   | 116.6(7)  |
| O(10)–Ce(1)–O(16) | 111.4(2)   | C(7)–N(8)–C(6)   | 108.1(8)  |
| O(15)–Ce(1)–O(16) | 65.3(2)    | C(7)–N(8)–H(8)   | 113.1     |
| O(14)–Ce(1)–O(16) | 68.4(3)    | C(6)–N(8)–H(8)   | 113.2     |
| O(4)–Ce(1)–O(11)  | 112.0(3)   | C(4)–N(7)–C(1)   | 109.0(9)  |
| O(6)–Ce(1)–O(11)  | 69.1(3)    | C(4)–N(7)–H(7)   | 116.0     |
| O(17)–Ce(1)–O(11) | 65.7(2)    | C(1)–N(7)–H(7)   | 112.3     |
| O(7)–Ce(1)–O(11)  | 111.7(2)   | O(13)–N(5)–O(15) | 115.3(13) |
| O(9)–Ce(1)–O(11)  | 112.4(2)   | O(13)–N(5)–O(14) | 126.8(12) |
| O(1)–Ce(1)–O(11)  | 130.07(14) | O(15)–N(5)–O(14) | 117.5(7)  |
| O(10)–Ce(1)–O(11) | 48.24(14)  | N(8)–C(6)–C(5)   | 105.2(8)  |
| O(15)–Ce(1)–O(11) | 112.0(3)   | N(8)–C(6)–H(6A)  | 110.7     |
| O(14)–Ce(1)–O(11) | 68.9(3)    | C(5)–C(6)–H(6A)  | 110.7     |
| O(16)–Ce(1)–O(11) | 68.6(2)    | N(8)–C(6)–H(6B)  | 110.7     |
| O(4)–Ce(1)–O(2)   | 68.4(3)    | C(5)–C(6)–H(6B)  | 110.7     |
| O(6)–Ce(1)–O(2)   | 112.0(3)   | H(6A)–C(6)–H(6B) | 108.8     |
| O(17)–Ce(1)–O(2)  | 112.9(2)   | C(2)–F(1)–Rb(1)  | 139.7(8)  |
| O(7)–Ce(1)–O(2)   | 70.3(2)    | F(2)–C(8)–C(7)   | 102.9(12) |
| O(9)–Ce(1)–O(2)   | 68.9(2)    | F(2)–C(8)–C(5)   | 109.9(13) |
| O(1)–Ce(1)–O(2)   | 48.06(14)  | C(7)–C(8)–C(5)   | 103.2(9)  |
| F(2)–C(8)–H(8A)   | 113.3      | C(8)–C(7)–H(7A)  | 110.9     |
| C(7)–C(8)–H(8A)   | 113.3      | N(8)–C(7)–H(7B)  | 110.9     |
| C(5)–C(8)–H(8A)   | 113.3      | C(8)–C(7)–H(7B)  | 110.9     |
| C(8)–F(2)–Rb(1)   | 146.1(9)   | H(7A)–C(7)–H(7B) | 109.0     |
| C(2)–C(1)–N(7)    | 105.2(10)  | F(1)–C(2)–C(1)   | 105.8(12) |
| C(2)–C(1)–H(1A)   | 110.7      | F(1)–C(2)–C(3)   | 111.5(13) |
| N(7)–C(1)–H(1A)   | 110.7      | C(1)–C(2)–C(3)   | 104.3(10) |
| C(2)–C(1)–H(1B)   | 110.7      | F(1)–C(2)–H(2)   | 111.6     |
| N(7)–C(1)–H(1B)   | 110.7      | C(1)–C(2)–H(2)   | 111.6     |
| H(1A)–C(1)–H(1B)  | 108.8      | C(3)–C(2)–H(2)   | 111.6     |
| N(8)–C(7)–C(8)    | 104.1(9)   | C(2)–C(3)–C(4)   | 103.9(10) |
| N(8)–C(7)–H(7A)   | 110.9      | C(2)–C(3)–H(3A)  | 111.0     |
| C(4)–C(3)–H(3A)   | 111.0      | C(8)–C(5)–H(5A)  | 110.8     |

|                  |          |                  |       |
|------------------|----------|------------------|-------|
| C(2)–C(3)–H(3B)  | 111.0    | C(6)–C(5)–H(5A)  | 110.8 |
| C(4)–C(3)–H(3B)  | 111.0    | C(8)–C(5)–H(5B)  | 110.8 |
| H(3A)–C(3)–H(3B) | 109.0    | C(6)–C(5)–H(5B)  | 110.8 |
| C(8)–C(5)–C(6)   | 104.8(9) | H(5A)–C(5)–H(5B) | 108.9 |

Table S3. Selected bond lengths and bond angles for **1** at 425 K.

| Bond       | Length/ Å | Bond            | Angles [°] |
|------------|-----------|-----------------|------------|
| O(2)–N(1)  | 1.85(13)  | O(1)–Rb(1)–N(1) | 0.000(6)   |
| Rb(1)–O(1) | 1.34(8)   | N(1)–O(1)–Rb(1) | 180.0      |
| Rb(1)–N(1) | 2.29(14)  | O(1)–N(1)–O(2)  | 157.8(17)  |
| F(1)–N(2)  | 1.61(14)  | O(1)–N(1)–Rb(1) | 0.000(6)   |
| O(1)–N(1)  | 0.95(14)  | O(2)–N(1)–Rb(1) | 157.8(17)  |

Table S4. Elemental analysis data for **1**.

| Compound | Element | Calcd (%) | Found (%) |
|----------|---------|-----------|-----------|
| <b>1</b> | C       | 12.38     | 12.34     |
|          | H       | 2.08      | 2.06      |
|          | N       | 14.44     | 14.46     |
|          | O       | 37.12     | 37.13     |
